# Supplementary material for: Dual mimic enzyme properties of Fe nanoparticles embedded in two-dimensional carbon nanosheets for colorimetric detection of biomolecules
Source: Royal Society of Chemistry journal article supplement (doi:10.1039/d2an01704k), 2022-12-01
Supplement: d2an01704k1.pdf [file d2an01704k1.pdf]

## Supporting Information

### **Dual mimic enzyme properties of Fe nanoparticles embedded in two-dimensional carbon nanosheets for colorimetric detection of biomolecules**

Jie Wang,<sup>‡a</sup> Chenglong Zhao,<sup>‡a</sup> Feijin Zhou,<sup>a</sup> Hui Lu,<sup>b</sup> Zhenhong Huang,<sup>b</sup> Cheng  
Yao<sup>\*a</sup> and Chan Song<sup>\*a</sup>

<sup>a</sup> *School of Chemistry and Molecular Engineering, Nanjing Tech University, Nanjing  
211816, China; Email: yaocheng@njtech.edu.cn; songchan@njtech.edu.cn*

<sup>b</sup> *Jiangsu Zhongdan Group Co., Ltd., Taixing 225453, China*

<sup>‡</sup> These two authors contributed equally to this work.

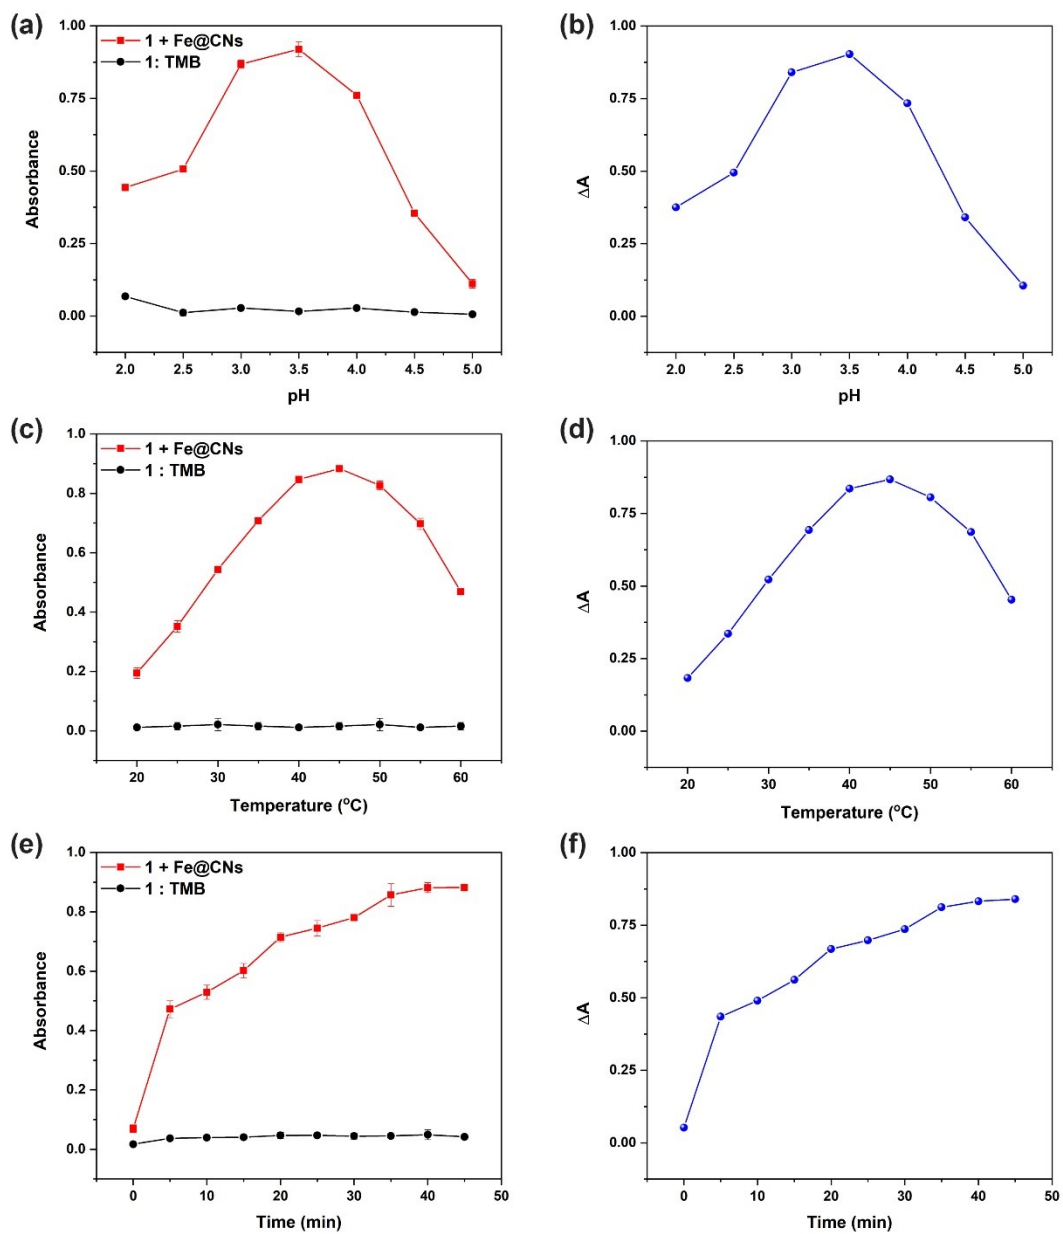

**Fig. S1** The effect of pH (a, b), reaction temperature (c, d), and incubation time (e, f) on the oxidase-like activity of Fe@CNs ( $0.2 \text{ g L}^{-1}$ ).  $\Delta A$  is the enhancement of absorbance intensity at 652 nm of the catalytic system ( $A - A_0$ ).  $A$  and  $A_0$  are the absorbance intensity at 652 nm of TMB ( $0.2 \text{ mM}$ .) with and without Fe@CNs, respectively.

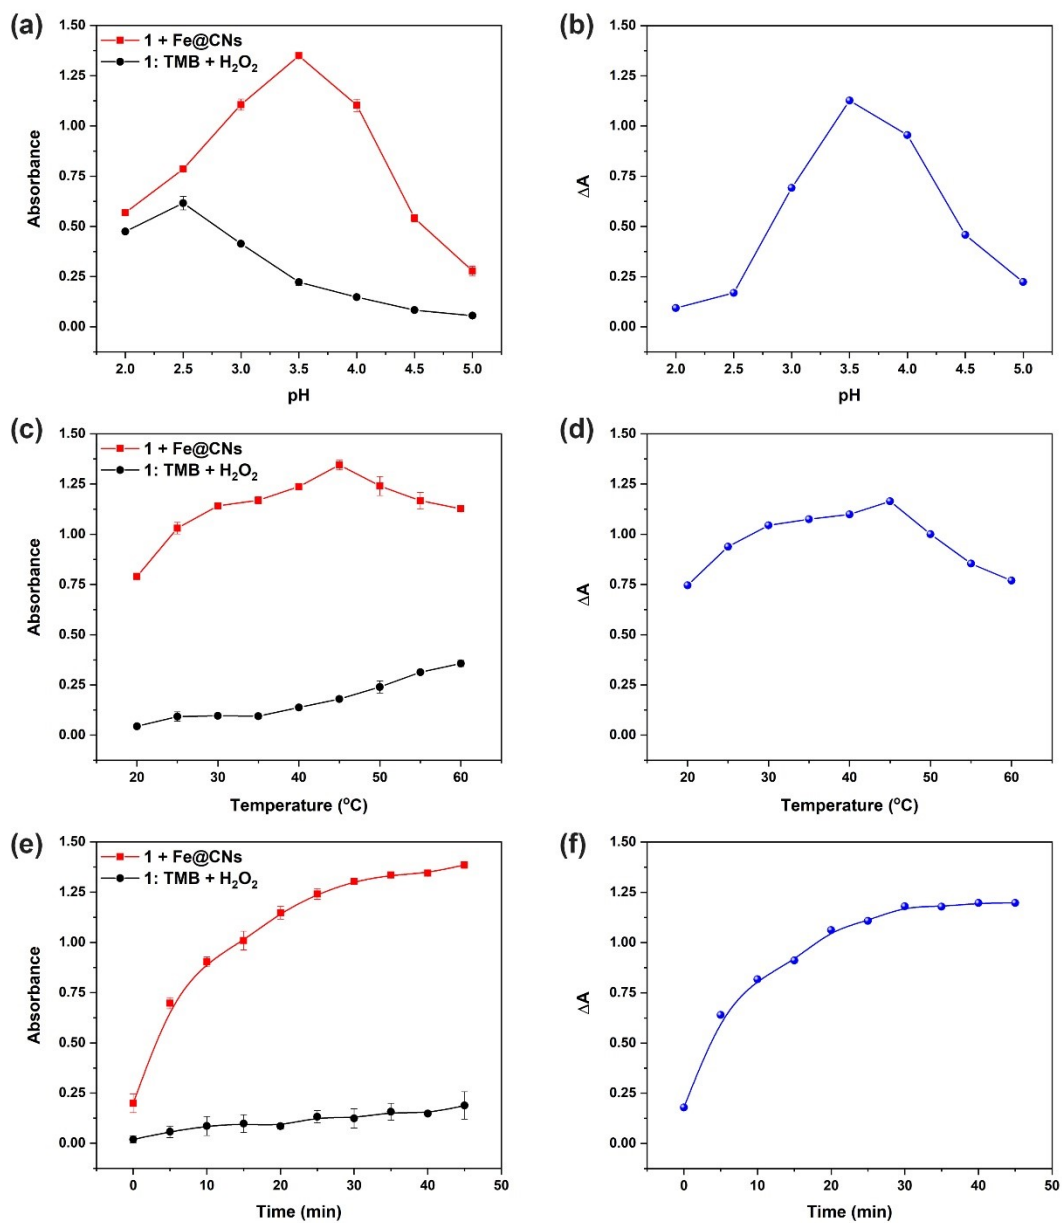

**Fig. S2** The effect of pH (a, b), reaction temperature (c, d), and incubation time (e, f) on the peroxidase-like activity of Fe@CNs ( $0.2 \text{ g L}^{-1}$ ).  $\Delta A$  is the enhancement of absorbance intensity at 652 nm of the catalytic system ( $A - A_0$ ).  $A$  and  $A_0$  are the absorbance intensity at 652 nm of TMB ( $0.2 \text{ mM}$ ) and  $\text{H}_2\text{O}_2$  ( $0.1 \text{ mM}$ ) with and without Fe@CNs, respectively.

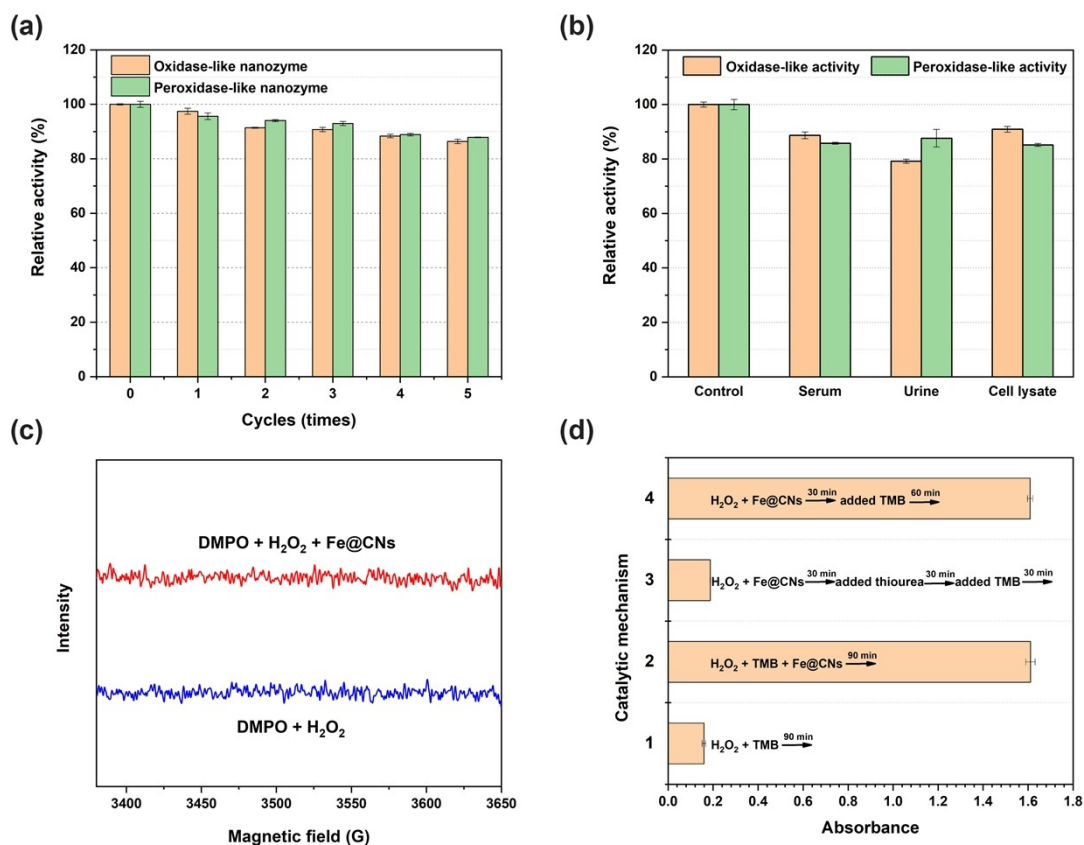

**Fig. S3** (a) The reusability of Fe@CNs as the oxidase-like nanozyme and peroxidase-like nanozyme in the catalytic system. (b) The catalytic activity of Fe@CNs in the catalytic system with the presence of 1% serum sample, 1% urine sample, and 1% cell lysate, respectively. (c) DMPO (100 mM) and H<sub>2</sub>O<sub>2</sub> (100 mM) with and without Fe@CNs (50 mg L<sup>-1</sup>) by using methanol as solvent. The sample was conducted in the condition without oxygen. (d) The absorbance intensity at 652 nm of the samples without oxygen under different experimental condition. Inset: schematic representations of the different reaction routes and ingredients. The total volume of samples was 1.5 mL.

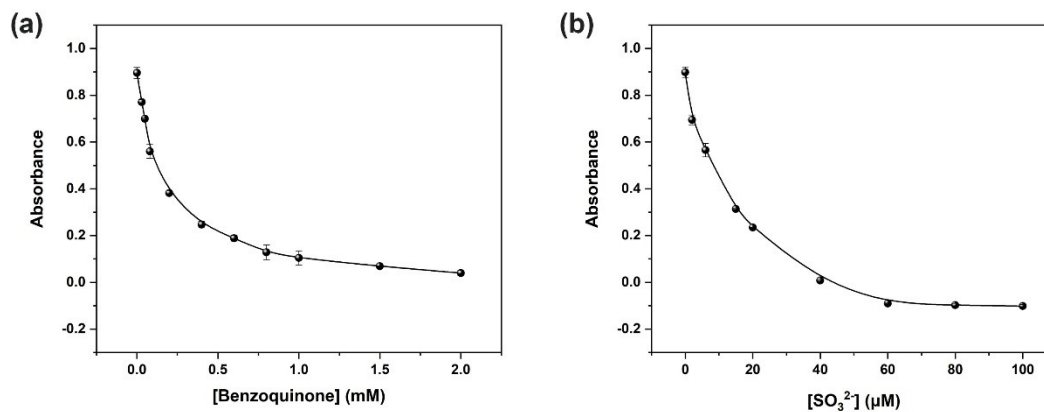

**Fig. S4** The effect of benzoquinone (a) and  $\text{SO}_3^{2-}$  (b) on the oxidase-like activity of Fe@CNs.

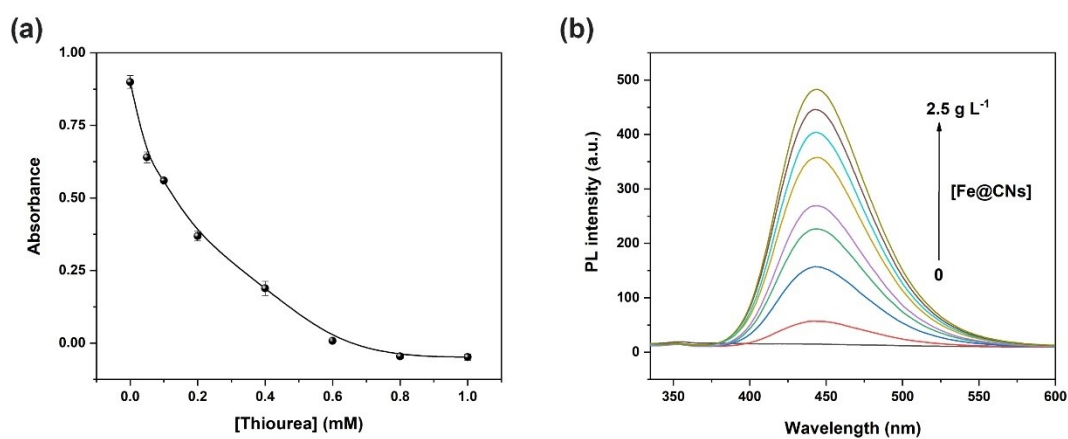

**Fig. S5** (a) The effect of thiourea with different concentration (0, 0.05, 0.1, 0.2, 0.4, 0.6, 0.8 and 1.0 mM) on the peroxidase-like activity of Fe@CNs.  $[\text{Fe@CNs}] = 0.2 \text{ g L}^{-1}$ ,  $[\text{TMB}] = 0.2 \text{ mM}$ ,  $[\text{H}_2\text{O}_2] = 0.1 \text{ mM}$ . (b) Phosphorescent intensity of the sample containing TA (0.625 mM),  $\text{H}_2\text{O}_2$  (50 mM) and different concentration of Fe@CNs (0, 0.1, 0.25, 0.4, 0.5, 1.0, 1.5, 2.0 and 2.5  $\text{g L}^{-1}$ ) under pH 3.5 with an excitation wavelength of 314 nm.

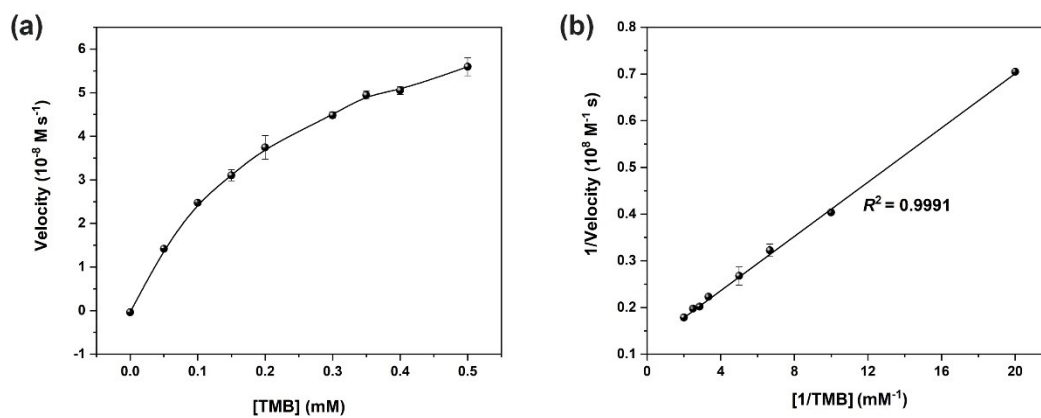

**Fig. S6** Steady-state kinetic analysis by using the Michaelis-Menten model (a) and Lineweaver-Burk double-reciprocal model (b) for the oxidase-like activity of Fe@CNs ( $0.2 \text{ g L}^{-1}$ ) at pH 3.5.

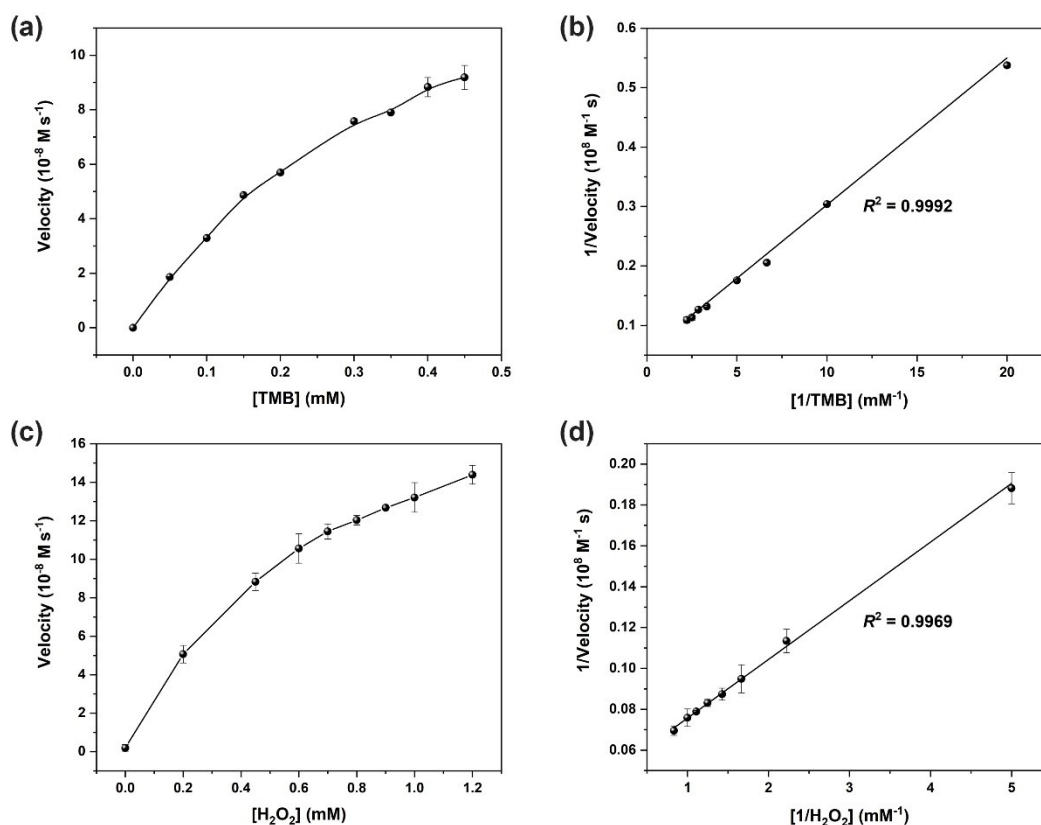

**Fig. S7** Steady-state kinetic analysis by using the Michaelis-Menten model (a and c) and Lineweaver-Burk double-reciprocal model (b and d) for the peroxidase-like activity of Fe@CNs (0.2 g L<sup>-1</sup>) at pH 3.5. (a) Reaction velocity plot with a fixed H<sub>2</sub>O<sub>2</sub> concentration (0.1 mM) and various TMB amount. (c) Reaction velocity plot with a fixed TMB concentration (0.2 mM) and various H<sub>2</sub>O<sub>2</sub> amount. (b) and (d) Double reciprocal plots for Fe@CNs with the amount of one substrate (TMB or H<sub>2</sub>O<sub>2</sub>) varied.

**Table S1.** The Michaelis-Menten constant ( $K_m$ ) of Fe@CNs and other nanomaterial-based oxidase-like nanozymes to TMB.

| Catalyst           | $K_m$ (mM)  | Reference        |
|--------------------|-------------|------------------|
| PCN-222 (Fe)       | 1.63        | 1                |
| Fe-Co-LDH          | 0.34        | 2                |
| Fe(III)-L3         | 2.03        | 3                |
| CS/Cu/Fe composite | 0.27        | 4                |
| Dex-FeMnzyme       | 0.33        | 5                |
| <b>Fe@CNs</b>      | <b>0.24</b> | <b>this work</b> |

**Table S2.** The Michaelis-Menten constant ( $K_m$ ) and maximum reaction velocity ( $V_{max}$ ) of HRP, Fe@CNs and other nanomaterial-based peroxidase-like nanozymes to  $H_2O_2$  and TMB.

| Catalysts             | Substrate | $K_m$ (mM)  | $V_m$ ( $10^{-8}$ M s $^{-1}$ ) | Reference        |
|-----------------------|-----------|-------------|---------------------------------|------------------|
| HRP                   | $H_2O_2$  | 3.70        | 8.71                            | 6                |
|                       | TMB       | 0.43        | 10.00                           |                  |
| ZnFe $_2$ O $_4$ MNPs | $H_2O_2$  | 1.66        | 7.74                            | 7                |
|                       | TMB       | 0.85        | 13.31                           |                  |
| Fe-NDs                | $H_2O_2$  | 0.87        | 3.76                            | 8                |
|                       | TMB       | 0.76        | 2.27                            |                  |
| Fe-MOF                | $H_2O_2$  | 1.3         | 2.5                             | 9                |
|                       | TMB       | 2.6         | 5.6                             |                  |
| Fe@CNs                | $H_2O_2$  | <b>0.50</b> | <b>21.22</b>                    | <b>this work</b> |
|                       | TMB       | <b>0.45</b> | <b>18.07</b>                    |                  |

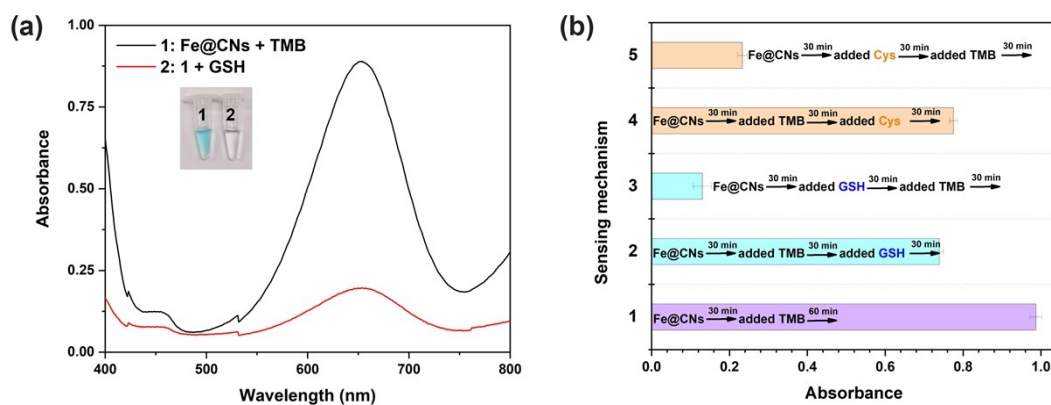

**Fig. S8** (a) UV-vis absorption curves of Fe@CNs ( $0.2 \text{ g L}^{-1}$ ) and TMB ( $0.2 \text{ mM}$ ) without and with GSH ( $100 \text{ }\mu\text{M}$ ), respectively. (b) The GSH/Cys sensing mechanism based on the oxidase-like catalytic activity of Fe@CNs. Inset: schematic representations of the different reaction routes and ingredients.



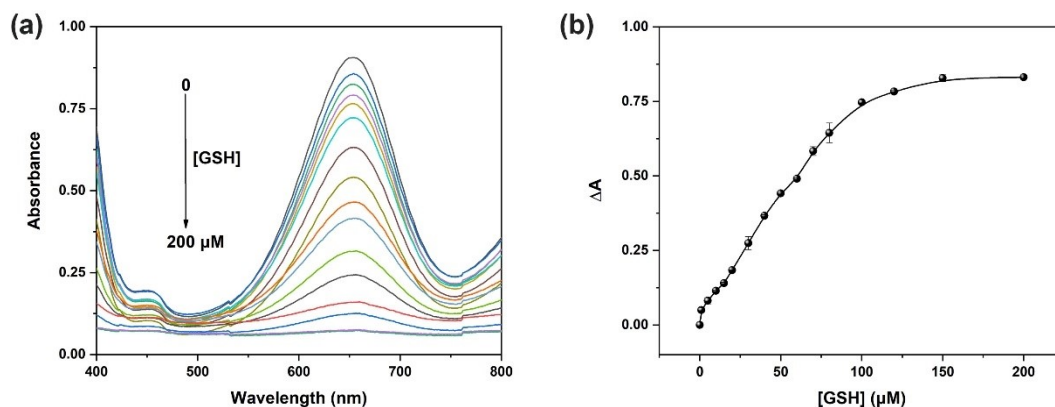

**Fig. S9** (a) UV-vis absorption curves of Fe@CNs ( $0.2 \text{ g L}^{-1}$ ) with TMB ( $0.2 \text{ mM}$ ) and different amounts of GSH. (b) The absorbance changes with increasing concentration of GSH.  $\Delta A$  is the enhancement of absorbance intensity at  $652 \text{ nm}$  of the catalytic system ( $A_0 - A$ ).  $A_0$  and  $A$  are the absorbance intensity at  $652 \text{ nm}$  of Fe@CNs and TMB without and with GSH, respectively.

**Table S3.** Comparison of different nanomaterial-based nanozymes as the sensing platform for GSH detection by colorimetric method.

| Nanozyme                                  | Linear range ( $\mu\text{M}$ ) | Detection limit ( $\mu\text{M}$ ) | Reference        |
|-------------------------------------------|--------------------------------|-----------------------------------|------------------|
| $\text{Cu}_{1.8}\text{S}$ NPs             | 500-10000                      | 60                                | 10               |
| CuS-PDA-Au                                | 0.5-100                        | 0.42                              | 11               |
| CBT-Cys(SEt)                              | 0-87                           | 1                                 | 12               |
| Au NCs                                    | 2-25                           | 0.42                              | 13               |
| Por-ZnFe <sub>2</sub> O <sub>4</sub> /rGO | 2-40                           | 0.76                              | 14               |
| Fe <sub>3</sub> O <sub>4</sub> NPs        | 3-30                           | 3.0                               | 15               |
| MnO <sub>2</sub> NSs                      | 1-25                           | 0.3                               | 16               |
| PS MOF                                    | 0-20                           | 0.68                              | 17               |
| <b>Fe@CNs</b>                             | <b>1-80</b>                    | <b>0.22</b>                       | <b>this work</b> |

**Table S4.** Recoveries of GSH, H<sub>2</sub>O<sub>2</sub> and glucose in 1% human serum sample.

| Target                        | Added ( $\mu\text{M}$ ) | Recovered ( $\mu\text{M}$ ) |       |       | Recovery (%)      |
|-------------------------------|-------------------------|-----------------------------|-------|-------|-------------------|
| GSH                           | 20                      | 19.0                        | 19.9  | 21.3  | 100.55 $\pm$ 5.79 |
|                               | 40                      | 36.5                        | 41.4  | 40.9  | 98.96 $\pm$ 6.66  |
|                               | 60                      | 65.6                        | 58.3  | 65.2  | 105.09 $\pm$ 6.82 |
| H <sub>2</sub> O <sub>2</sub> | 50                      | 51.8                        | 47.3  | 48.2  | 98.22 $\pm$ 4.75  |
|                               | 100                     | 100.1                       | 102.0 | 102.3 | 101.48 $\pm$ 1.17 |
|                               | 150                     | 157.5                       | 165.3 | 152.3 | 105.51 $\pm$ 4.45 |
| glucose                       | 50                      | 49.9                        | 46.6  | 50.8  | 98.22 $\pm$ 4.47  |
|                               | 100                     | 107.6                       | 101.7 | 95.0  | 101.43 $\pm$ 6.27 |
|                               | 150                     | 155.1                       | 151.6 | 158.6 | 103.40 $\pm$ 2.36 |

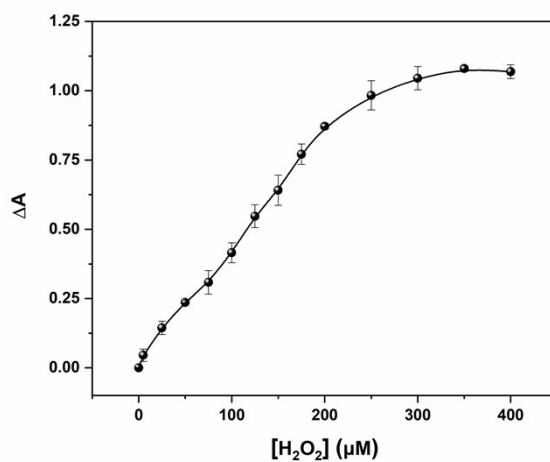

**Fig. S10** The absorbance changes with increasing concentration of H<sub>2</sub>O<sub>2</sub>.  $\Delta A$  is the enhancement of absorbance intensity at 652 nm of the catalytic system ( $A-A_0$ ).  $A$  and  $A_0$  are the absorbance intensity at 652 nm of Fe@CNs (0.2 g L<sup>-1</sup>) and TMB (0.2 mM) with and without H<sub>2</sub>O<sub>2</sub>, respectively.

**Table S5.** Comparison of different nanomaterial-based peroxidase-like nanozyme as the sensing platform for H<sub>2</sub>O<sub>2</sub> detection by colorimetric method.

| Nanozyme                            | Linear range ( $\mu\text{M}$ )    | Detection limit ( $\mu\text{M}$ ) | Reference        |
|-------------------------------------|-----------------------------------|-----------------------------------|------------------|
| Cys-MoS <sub>2</sub> NFs            | 0-300                             | 4.103                             | 18               |
| CePO <sub>4</sub> -CeO <sub>2</sub> | 5-150                             | 2.9                               | 19               |
| FeMnO <sub>3</sub> @PPy NTs         | 0-100                             | 3.2                               | 20               |
| FePPOP-1                            | 20-1000                           | 6.5                               | 21               |
| CuZnFeS NCs                         | 10-55                             | 3                                 | 22               |
| M-CQDs                              | 20-200                            | 15                                | 23               |
| ZIF-67                              | $1 \times 10^5$ - $1 \times 10^6$ | 110                               | 24               |
| CDs@ZIF-8-a                         | 100-1000                          | 3.6                               | 25               |
| <b>Fe@CNs</b>                       | <b>5-200</b>                      | <b>2.04</b>                       | <b>this work</b> |

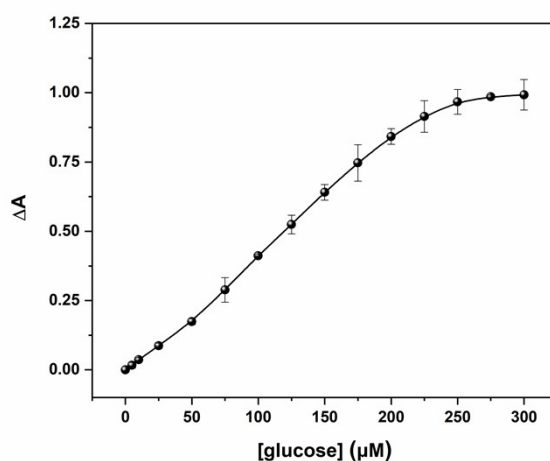

**Fig. S11** The absorbance changes with increasing concentration of glucose.  $\Delta A$  is the enhancement of absorbance intensity at 652 nm of the catalytic system ( $A - A_0$ ).  $A$  and  $A_0$  are the absorbance intensity at 652 nm of Fe@CNs ( $0.2 \text{ g L}^{-1}$ ) and TMB ( $0.2 \text{ mM}$ ) with and without glucose, respectively.

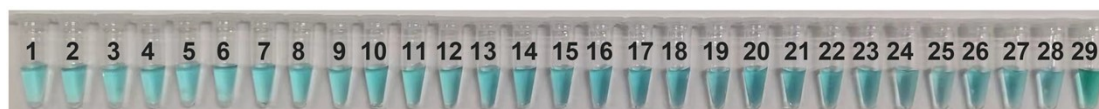

**Fig. S12** The photographs of the specificity analysis of the glucose detection. The concentration of the interfering species, and glucose was  $150 \mu\text{M}$ .

**Table S6.** Comparison of different nanomaterial-based peroxidase-like nanozyme as the sensing platform for glucose detection by colorimetric method.

| <b>Nanozyme</b>                     | <b>Linear range (<math>\mu\text{M}</math>)</b> | <b>Detection limit (<math>\mu\text{M}</math>)</b> | <b>Reference</b> |
|-------------------------------------|------------------------------------------------|---------------------------------------------------|------------------|
| FePPOPs-SO <sub>3</sub> H           | 200-1500                                       | 16.38                                             | 26               |
| CeO <sub>2</sub> /Zeolite Y         | 0-340                                          | 35.4                                              | 27               |
| Fe <sub>3</sub> O <sub>4</sub> MNPs | 50-1000                                        | 30                                                | 28               |
| 6Fe/CeO <sub>2</sub> NRs            | 1-100                                          | 3.41                                              | 29               |
| Fe@PCN-224 NPs                      | 30-800                                         | 22                                                | 30               |
| WSe <sub>2</sub> NSs                | 10-60                                          | 10                                                | 31               |
| CoPW <sub>11</sub> O <sub>39</sub>  | 33-500                                         | 23.4                                              | 32               |
| Co <sub>3</sub> O <sub>4</sub> NPs  | 20-200                                         | 5                                                 | 33               |
| <b>Fe@CNs</b>                       | <b>5-225</b>                                   | <b>2.28</b>                                       | <b>this work</b> |

## Reference

1. D. Feng, Z. Y. Gu, J. R. Li, H. L. Jiang, Z. Wei and P. D. H.-C. Zhou, *Angew. Chem.* 2012, 51, 10307-10310.
2. X. Xu, X. Zou, S. Wu, L. Wang, J. Pan, M. Xu, W. Shan, X. Li and X. Niu, *Microchim Acta.* 2019, 186, 815.
3. L. Zhang, Y. Hou, X. Guo, W. Liu, C. Lv, C. Zhang, Y. Jin and B. Li, *Luminescence.* 2020, 35, 1350-1359.
4. Y. Zou, Q. Chai, T. Zhu, X. Yu, G. Mao, N. Li, J. Chen and G. Lai, *Spectrochim. Acta A Mol. Biomol.* 2022, 266, 120410.
5. X. Han, L. Liu, H. Gong, L. Luo, Y. Han, J. Fan, C. Xu, T. Yue, J. Wang and W. Zhang, *Food Chem.* 2022, 371, 131115.
6. Y. Guo, L. Deng, J. Li, S. Guo, E. Wang and S. Dong, *ACS Nano.* 2011, 5, 1282-1290.
7. L. Su, J. Feng, X. Zhou, C. Ren, H. Li and X. Chen, *Anal. Chem.* 2012, 84, 5753-5758.
8. Y. Liu, J. Yan, Y. Huang, Z. Sun, H. Zhang, L. Fu, X. Li and Y. Jin, *Front. Bioeng. Biotechnol.* 2022, 9, 790849.
9. W. Xu, L. Jiao, H. Yan, Y. Wu, L. Chen, W. Gu, D. Du, Y. Lin and C. Zhu, *ACS Appl Mater Inter.* 2019, 11, 22096-22101.
10. H. Zou, T. Yang, J. Lan and C. Huang, *Anal. Methods.* 2017, 9, 841-846.
11. Y. Wang, Y. Liu, F. Ding, X. Zhu, L. Yang, P. Zou, H. Rao, Q. Zhao and X. Wang, *Anal Bioanal Chem.* 2018, 410, 4805-4813.
12. Y. Yuan, J. Zhang, M. Wang, B. Mei, Y. Guan and G. Liang, *Anal. Chem.* 2013, 85, 1280-1284.
13. J. Feng, P. Huang, S. Shi, K.-Y. Deng and F.-Y. Wu, *Anal. Chim. Acta.* 2017, 967, 64-69.
14. B. Bian, Q. Liu and S. Yu, *Colloids Surf. B.* 2019, 181, 567-575.
15. Y. Ma, Z. Zhang, C. Ren, G. Liu and X. Chen, *Analyst.* 2012, 137, 485-489.
16. J. Liu, L. Meng, Z. Fei, P. J. Dyson, X. Jing and X. Liu, *Biosens. Bioelectron.* 2017, 90, 69-74.
17. Y. Liu, M. Zhou, W. Cao, X. Wang, Q. Wang, S. Li and H. Wei, *Anal. Chem.* 2019, 91, 8170-8175.
18. J. Yu, D. Ma, L. Mei, Q. Gao, W. Yin, X. Zhang, L. Yan, Z. Gu, X. Ma and Y. Zhao, *J Mater Chem B.* 2018, 6, 487-498.
19. G. Vinothkumar, A. I. Lalitha and K. Suresh Babu, *Inorg. Chem.* 2018, 58, 349-358.
20. M. Chi, S. Chen, M. Zhong, C. Wang and X. Lu, *Chem. Comm.* 2018, 54, 5827-5830.
21. C. Cui, Q. Wang, Q. Liu, X. Deng, T. Liu, D. Li and X. Zhang, *Sens. Actuators B Chem.* 2018, 277, 86-94.
22. A. Dalui, B. Pradhan, U. Thupakula, A. H. Khan, G. S. Kumar, T. Ghosh, B. Satpati and S. Acharya, *Nanoscale,* 2015, 7, 9062-9074.
23. S. Chandra, V. K. Singh, P. K. Yadav, D. Bano, V. Kumar, V. K. Pandey, M. Talat and S. H. Hasan, *Anal. Chim. Acta.* 2019, 1054, 145-156.
24. S. Wang, D. Xu, L. Ma, J. Qiu, X. Wang, Q. Dong, Q. Zhang, J. Pan and Q. Liu, *Anal. Bioanal. Chem.* 2018, 410, 7145-7152.
25. Y. Wang, X. Liu, M. Wang, X. Wang, W. Ma and J. Li, *Sens. Actuators B Chem.* 2021, 329, 129115.
26. T. Liu, J. Tian, L. Cui, Q. Liu, L. Wu and X. Zhang, *Colloids Surf. B.* 2019, 178, 137-145.
27. X. Cheng, L. Huang, X. Yang, A. A. Elzatahry, A. Alghamdi and Y. Deng, *J. Colloid*

- Interface Sci.* 2019, 535, 425-435.
28. H. Wei and E. Wang, *Anal. Chem.* 2008, 80, 2250-2254.
29. Jampaiah. D, Srinivasa Reddy. T, Kandjani. A. E, Selvakannan. P. R, Sabri. Y. M, Coyle. V. E, Shukla. R and Bhargava. S. K, *J Mater Chem B.* 2016, 4, 3874-3885.
30. T. Li, P. Hu, J. Li, P. Huang, W. Tong and C. Gao, *Colloids Surf. A Physicochem. Eng. Asp.* 2019, 577, 456-463.
31. T. Chen, X. Wu, J. Wang and G. Yang, *Nanoscale.* 2017, 9, 11806-11813.
32. Y. He, X. Li, X. Xu, J. Pan and X. Niu, *J Mater Chem B.* 2018, 6, 5750-5755.
33. H. Jia, D. Yang, X. Han, J. Cai, H. Liu and W. He, *Nanoscale.* 2016, 8, 5938-5945.
